# Supplementary material for: PiFM and XPS Studies of Porous TiO2 Films for the Photocatalytic Decomposition of Polystyrene
Source: MDPI journal article supplement (doi:10.3390/catal13040725), 2023-04-11
Supplement: s1 [file s1]

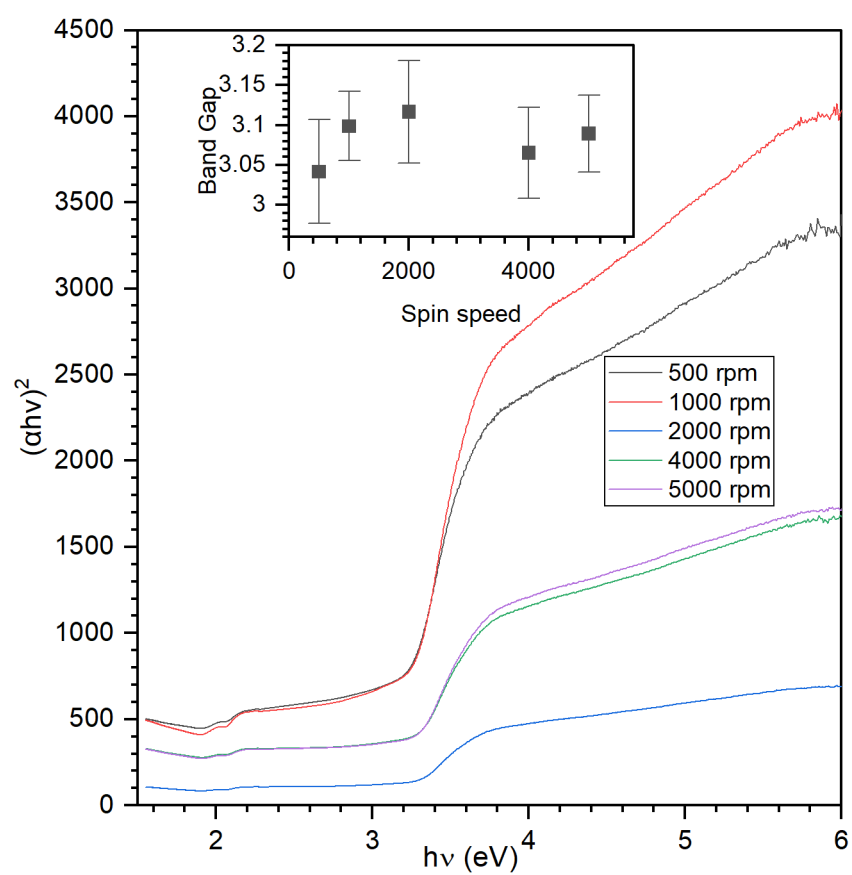

Figure S3 Tauc Plots and calculated band gaps of the spin coated 0.1 wt% TiO<sub>2</sub> catalysts

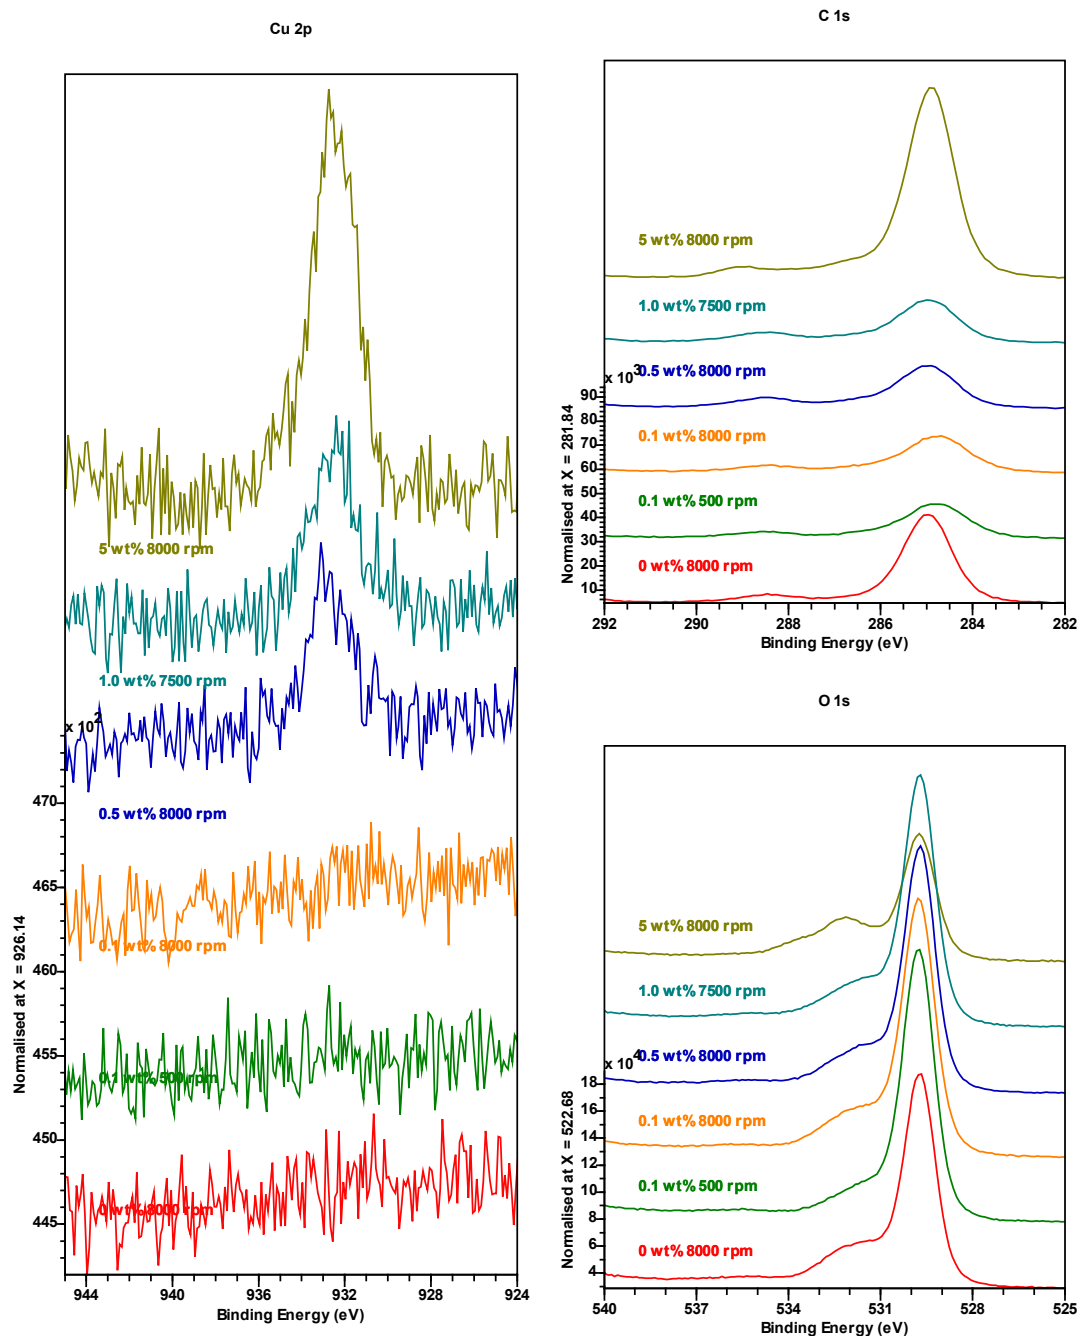

Figure S4 Photoelectron spectra of the Cu doped  $\text{TiO}_2$  catalysts deposited at different spin speeds and with different wt% of Cu.

Figure S 4 shows that even for the highest copper concentrations studied the satellite and Auger peaks are not strong enough to be observed against the background and cannot therefore be used to assign oxidation state.

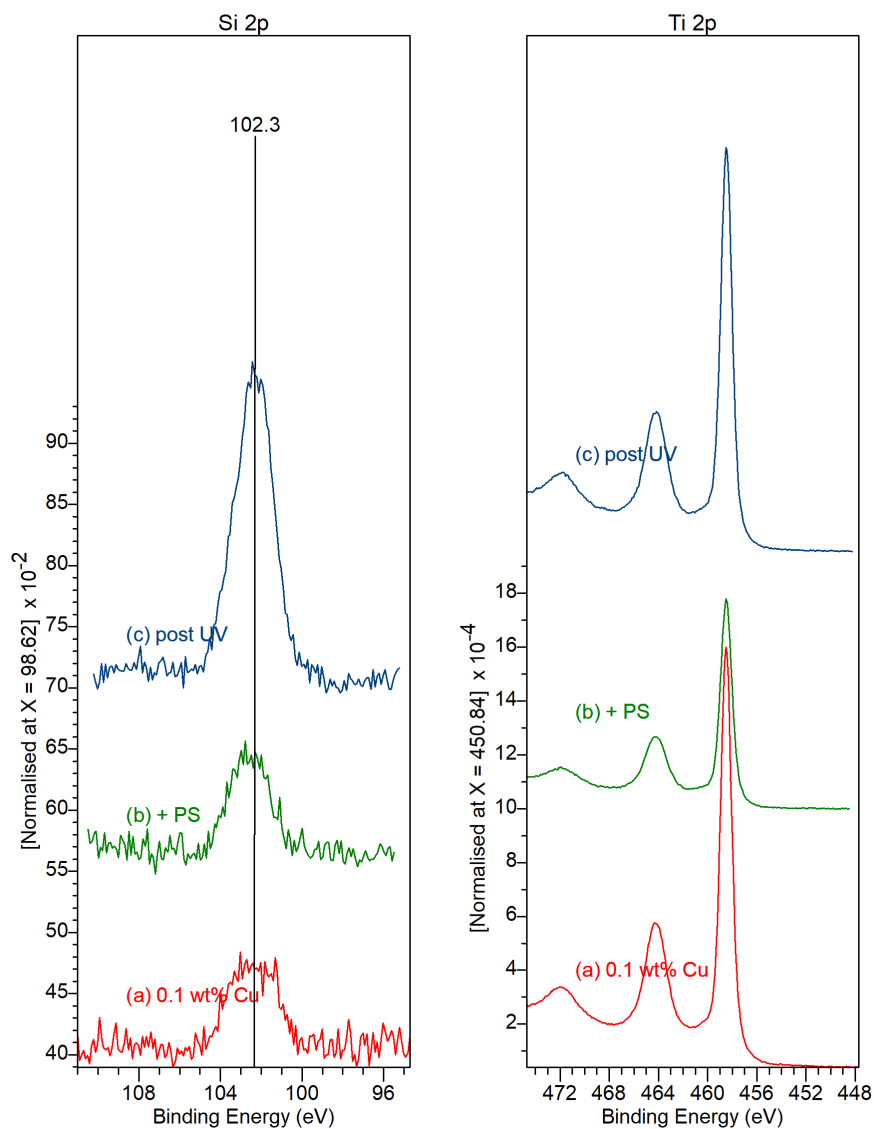

Figure S5 Further photoelectron spectra of the 0.1 wt% Cu doped  $\text{TiO}_2$  catalysts comparing the clean film with the polystyrene coated film before and after photocatalysis.

Figure S 5 shows additional XP spectra that show the consistent 4+ state of the Ti2p peaks. Deposition of the PS film strongly reduces the intensity of the substrate which is then recovered when the PS is oxidised away. The Si2p arises from the glass substrate.

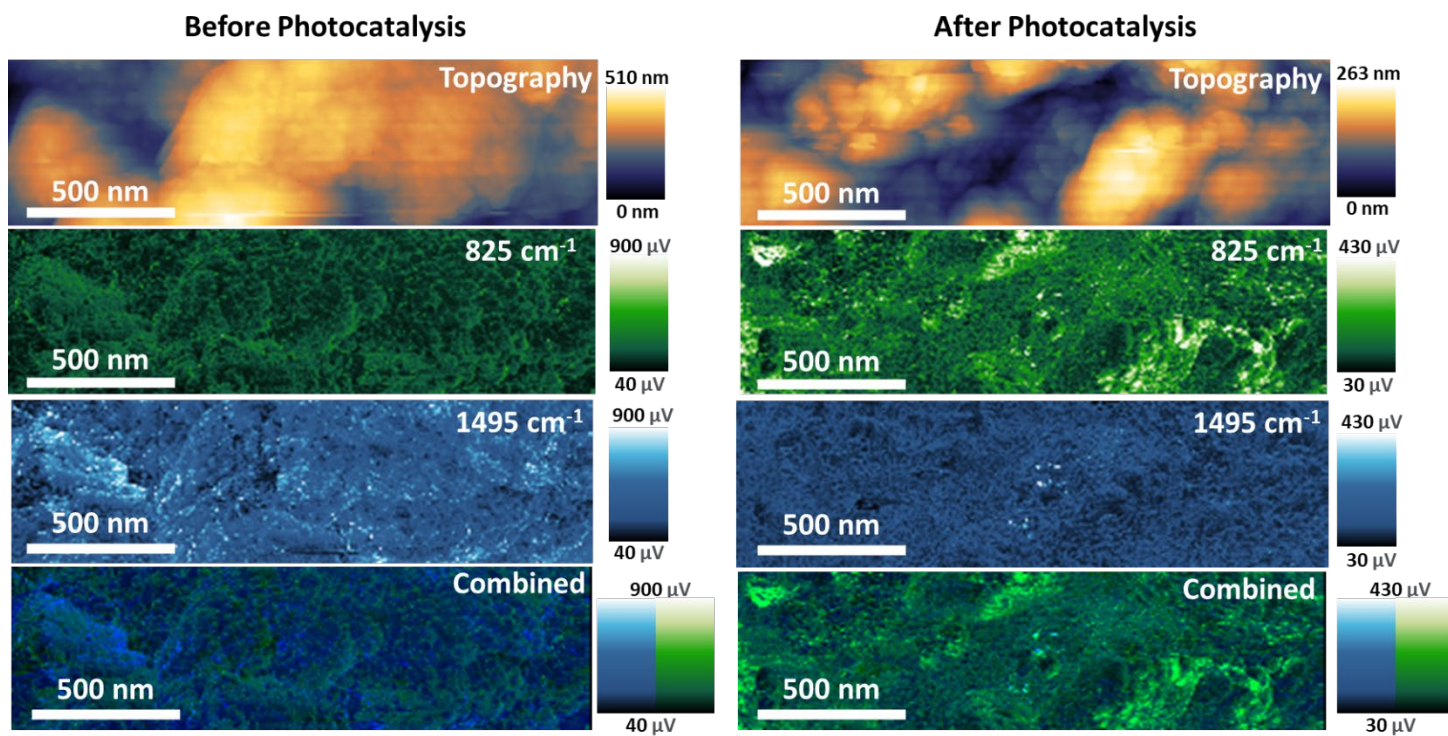

Figure S6: PiFM micrographs of 0.1 wt% Cu doped  $\text{TiO}_2$  treated with polystyrene before and after photocatalytic treatment. Green shows  $1495 \text{ cm}^{-1}$  polystyrene signal, Blue shows  $825 \text{ cm}^{-1}$   $\text{TiO}_2$  stretch.
