# Supplementary material for: PiFM and XPS Studies of Porous TiO2 Films for the Photocatalytic Decomposition of Polystyrene
Source: MDPI journal article supplement (doi:10.3390/catal13040725), 2023-04-11
Supplement: s1 [file s1]

Archive with 1 entries (1 files):
- catalysts-2305817-supplementary.pdf
